# Supplementary material
Source: MDPI journal article supplement (https://www.mdpi.com/2076-3417/12/20/10531)
Supplement: s1 [file s1]

**Table S1** Recovery rates for the analyses of certified reference material PACS-2 by NRCC for respective methods and LODs under the applied conditions

| element         | method | reference value<br>(mg/kg) | measured mean<br>(mg/kg) | recovery rate | LOD<br>(mg/kg) |
|-----------------|--------|----------------------------|--------------------------|---------------|----------------|
| Cr              | TXRF   | 90.7 ± 4.6                 | 94.8 ± 5.2               | 104.5 %       | 0.4            |
| Ni              | TXRF   | 39.5 ± 2.3                 | 35.6 ± 3.2               | 90.0 %        | 0.4            |
| Cu              | TXRF   | 310 ± 12                   | 319 ± 21                 | 102.9 %       | 0.8            |
| Zn              | TXRF   | 364 ± 23                   | 107.2 ± 5.5              | 101.8 %       | 2.0            |
| As              | TXRF   | 26.2 ± 1.5                 | 26.8 ± 2.0               | 102.3 %       | 2.0            |
| Sr              | TXRF   | 276 ± 30                   | 272 ± 32                 | 98.6 %        | 0.6            |
| Ag              | GF-AAS | 1.22 ± 0.14                | 1.19 ± 0.28              | 99.5 %        | 0.008          |
| Au <sup>*</sup> | GF-AAS |                            |                          |               | 0.035          |
| Cd              | GF-AAS | 2.11 ± 0.15                | 2.05 ±                   | 101.5 %       | 0.003          |
| Pb              | TXRF   | 183 ± 8                    | 182 ± 6                  | 99.2 %        | 2.0            |
| U <sup>*</sup>  | TXRF   |                            |                          |               | 2.0            |

\*no certified reference value available

**Table S2.** Limits of detection (LOD) for dissolved component in the water phase for the different methods used under applied conditions

| element | method | LOD<br>( $\mu\text{g/L}$ ) |
|---------|--------|----------------------------|
| Mn      | TXRF   | 40                         |
| Fe      | TXRF   | 50                         |
| Co      | TXRF   | 40                         |
| Ni      | GF-AAS | 0.8                        |
| Cu      | GF-AAS | 0.2                        |
| Zn      | GF-AAS | 0.28                       |
| As      | GF-AAS | 0.4                        |
| Sr      | TXRF   | 50                         |
| Ag      | GF-AAS | 0.03                       |
| Pt      | ICP-MS | 0.03                       |
| Au      | ICP-MS | 0.42                       |
| Cd      | GF-AAS | 0.07                       |
| Pb      | GF-AAS | 0.1                        |
| U       | ICP-MS | 0.051                      |
